# Supplementary material for: The Growth and Conidiation of Purpureocillium lavendulum Are Co-Regulated by Nitrogen Sources and Histone H3K14 Acetylation
Source: MDPI journal article supplement (doi:10.3390/jof9030325), 2023-03-06
Supplement: s1 [file s1]

## Supplementary materials

### **The Growth and Conidiation of *Purpureocillium lavendulum* Are Regulated by Nitrogen Source and Histone H3K14 Acetylation**

Ping Tang<sup>†</sup>, Jing-Jing Han<sup>†</sup>, Chen-Chen Zhang, Feng-Na Qi, Ping-Ping Tang,

Ke-Qin Zhang, Lian-Ming Liang \*

State Key Laboratory for Conservation and Utilization of Bio-Resources in Yunnan and  
The Key Laboratory for Southwest Microbial Diversity of the Ministry of Education,  
Yunnan University, Kunming, 650091, China.

<sup>†</sup> These authors contributed equally to this work.

\*Correspondence: lianglm@ynu.edu.cn (L-ML); Tel: +86 871 65033805;

Fax: +86 871 65034838;

### Media formulations:

PDA: glucose 2%, potato 200g/L (boiled for 30min, filtered with gauze), agar 2%.

MM: Vogel's 20ml/L, glucose 20g/L, agar 20g/L.

50×Vogel's : Sodium citrate·2H<sub>2</sub>O 12.5%(w/v), KNO<sub>3</sub> 12.6%, KH<sub>2</sub>PO<sub>4</sub> 8%(w/v), MgSO<sub>4</sub>·7H<sub>2</sub>O 1% (w/v), CaCl<sub>2</sub>·2H<sub>2</sub>O 0.5% (w/v), Trace element 5mL /L, Biotin Solution(0.1mg /L) 2.5mL /L, Chloroform 2ml/L (As a preservative)

Trace element(w/v): Citric acid.H<sub>2</sub>O 5%, ZnSO<sub>4</sub>·7H<sub>2</sub>O 5%, Fe(NH<sub>4</sub>)<sub>2</sub>(SO<sub>4</sub>)<sub>2</sub>·6H<sub>2</sub>O 1%, CuSO<sub>4</sub>·5H<sub>2</sub>O 0.25%, MnSO<sub>4</sub>·H<sub>2</sub>O 0.05%, H<sub>3</sub>BO<sub>3</sub> 0.05%, Na<sub>2</sub>MoO<sub>4</sub>·2H<sub>2</sub>O 0.05%.

**Table S1. Primers used in this study**

| Primer Name | Sequence (5'-3')                                        | Fragment size (bp) | Function                                                                                                                                                                                |
|-------------|---------------------------------------------------------|--------------------|-----------------------------------------------------------------------------------------------------------------------------------------------------------------------------------------|
| GCN5-5f     | GGCCAGTGCCAAGCTTGCATGCCTGCAGGGAA<br>ATCTCCGCGAGCGAATC   | 1228bp             | Amplification of upstream fragment of GCN5, The underline represents the homologous sequence with the restriction site of plasmid, and the thickening sequence is the restriction site. |
| GCN5-5r     | GGCGTTGGcACAGATCTAGTcTCTAGACGTGTC<br>AACCTCACCTACCCATC  |                    |                                                                                                                                                                                         |
| GCN5-3f     | ACGGGAATTGCATGCTCTCAcACTAGTGATCC<br>AGAGCTGc ACATACAccG | 1289bp             | Amplification of downstream fragment of GCN5                                                                                                                                            |

|                    |                                                         |         |                                                                                                      |
|--------------------|---------------------------------------------------------|---------|------------------------------------------------------------------------------------------------------|
| <b>GCN5-3r</b>     | TAATCGACCGACGGAATTGAGGATATCGGAGC<br>AGGGCATC ATCATTCG   |         |                                                                                                      |
| <b>GCN5-F</b>      | CGAACCCGACGAGGAACT                                      | 3210bp  | Verify that GCN5 is knocked out                                                                      |
| <b>GCN5-R</b>      | GCCTGCGTTGTGTTTAGCC                                     |         |                                                                                                      |
| <b>GFP-F</b>       | CACCTTGATGCCGTTCTT                                      | 750bp   | Random insertion validation of GCN5 knockout strain                                                  |
| <b>GFP-R</b>       | AcCCTTTGGCTCGCTTA                                       |         |                                                                                                      |
| <b>GCN5-T-F</b>    | TCCGACGCAAACCTGATG                                      | 604bp   | Preparation of Southern blot probe                                                                   |
| <b>GCN5-T-R</b>    | AGTCCGTTCTCCCCACA                                       |         |                                                                                                      |
| <b>H3-5F</b>       | CCGACGAAGTATGGTAGACACC                                  | 2275 bp | Upstream segment of histone H3 gene connected to pEASYH3-5R CGAGGACGTAGCCAATCAAAA Blunt Zero Cloning |
| <b>H3-5R</b>       | CGAGGACGTAGCCAATCAAAA                                   |         |                                                                                                      |
| <b>H3-SbfI-5F</b>  | GGCCAGTGCCAAGCTTGCATGCCTGCAGGCCG<br>ACGAAGTATGGTAGACACC | 2275 bp | Amplification of upstream fragment of histone H3 gene                                                |
| <b>H3-XbaI-5R</b>  | GGCGTTGGCACAGATCTAGTCTCTAGAC<br>GAGGACGTAGCCAATCAAAA    |         |                                                                                                      |
| <b>H3-EcoRV-3F</b> | CATGCTCTCACACTAGTGACTGATATC<br>GAAGAGTCGCATCGTCAAAC     | 1022 bp | Amplification of downstream fragment of histone H3 gene                                              |
| <b>H3-EcoRV-3R</b> | TAATCGACCGACGGAATTGAGGATATC<br>GGTGGTGGTCAACAAAGGGT     |         |                                                                                                      |
| <b>PEASY-F</b>     | TGCTAAGGCGCACGACCC                                      | 942bp   | Sequencing primers to find the correct mutant plasmid                                                |
| <b>PEASY-R</b>     | ACTCGAATAAGCCTTTG                                       |         |                                                                                                      |
| <b>H3-F</b>        | ACCAGTGCATCAACTCGTAT                                    | 1443bp  | Genome Validation for Transformation of Mutant Vector into P. lavendulum                             |
| <b>H3-R</b>        | GCTTGGTGATGCCCTGAAT                                     |         |                                                                                                      |
| <b>brlA-CDS-R</b>  | CTCACCATGTTGACGGTTGTGAAATCGTCGCC<br>CCGCTTCTC           | 1163bp  | Amplification of brlA-CDS can be used as a linker between brlA-CDS and GFP                           |
| <b>brlA-CDS-F</b>  | CCAAGCTTGCATGCCATGCAGTTCTGAATCCGA<br>CTTT               |         |                                                                                                      |

|                            |                                           |        |                                                                                                                                                            |
|----------------------------|-------------------------------------------|--------|------------------------------------------------------------------------------------------------------------------------------------------------------------|
| <b>GFP-F</b>               | ACAACCGTCAACATGGTGAGC                     | 946bp  | Amplification of GFP fragment as a linker primer between brlA-CDS fragment and GFP fragment                                                                |
| <b>GFP-R</b>               | AGATCTAGTCTCTAGGTTGATAATGGGAATTG<br>ATTA  |        |                                                                                                                                                            |
| <b>brlA-GFP-3F</b>         | ATGCTCTCACACTAGGACACACATTGCCCCGGC<br>GTCT | 1379bp | Amplification of downstream homologous arms                                                                                                                |
| <b>brlA-GFP-3R</b>         | TCGCGGCCGCGGATCCATCCATCCAGTCCAGA<br>CTCC  |        |                                                                                                                                                            |
| <b>GFPxiaYZ-F</b>          | CAGTGCATCAACTCGTATAG                      | 1662bp | Sequencing primers to verify whether the downstream fragment was successfully connected and genome validation of the mutant transformed into P. lavendulum |
| <b>GFPxiaYZ-R</b>          | ACTGGAAAGCGGGCAGTGAG                      |        |                                                                                                                                                            |
| <b>brlA-GFP-ShangYZ-F</b>  | CTCTTCGCTATTACGCCAGC                      | 2121bp | Sequencing primers to verify whether the upstream fragment was successfully connected and genome validation of the mutant transformed into P. lavendulum   |
| <b>brlA-GFP-ShangYZ-R</b>  | CATGTTTGCCGCCATCGGAG                      |        |                                                                                                                                                            |
| <b>second-TOR3-F</b>       | aaacactgatagtttAGTTTTGGGGCTGGAGAGT        | 743bp  | The downstream homologous arm was amplified to verify whether the downstream fragment was successfully connected.                                          |
| <b>second-TOR3-R</b>       | actgctggcctctagGCGGCTTTATTAGCATTGTTC      |        |                                                                                                                                                            |
| <b>second-TOR5-F</b>       | ggcattatacactagGTCGGCGGCTGAGATTTAG        | 977bp  | The upstream homologous arm was amplified to verify whether the downstream fragment was successfully connected.                                            |
| <b>second-TOR5-R</b>       | atggacgagctgtacTGCTTGTCTGCGTGCTGTT        |        |                                                                                                                                                            |
| <b>YZ-tublin-F</b>         | GCACAATCATCGCAAACCG                       | 1165bp | Validation of genomic tublin after vector plasmid transformed into P. lavendulum                                                                           |
| <b>YZ-tublin-R</b>         | GCCCCGACAACCTTCGTCTT                      |        |                                                                                                                                                            |
| <b>tor-geneYZ-tublin-F</b> | TTGTGGTCCCCAAAGTA                         | 830bp  | Validation of TOR vector plasmid transformed into genome tublin of P. lavendulum                                                                           |

tor-geneYZ-  
tublin-R

AGCGACATAAGCATCCC

**Table S2.** Peak statistics in conidiation related genes in ChIP-seq

| Order | Gene          | In <i>P. lavendulum</i> | ChIP-seq Peaks |       | Function                                                                            |
|-------|---------------|-------------------------|----------------|-------|-------------------------------------------------------------------------------------|
|       |               |                         | PDB            | PDB-N |                                                                                     |
| 1     | <i>PlbrlA</i> | Contig6.18              | 3              | 0     | Production conidia core, spore germination                                          |
| 2     | <i>PlabaA</i> | Contig3.44              | 8              | 1     | Determines the differentiation of conidiophores                                     |
| 3     | <i>PlwetA</i> | Contig3.72              | 2              | 0     | Conidia cell wall integrity, conidia maturation, regulation of trehalose production |
| 4     | <i>PlflbA</i> | Contig1.16              | 32             | 5     | Normal conidiation, conidiation decreased after knockout                            |
| 5     | <i>PlfluG</i> | Contig4.91              | 5              | 0     | Normal conidiation and delayed conidiation after knockout                           |

## Figures

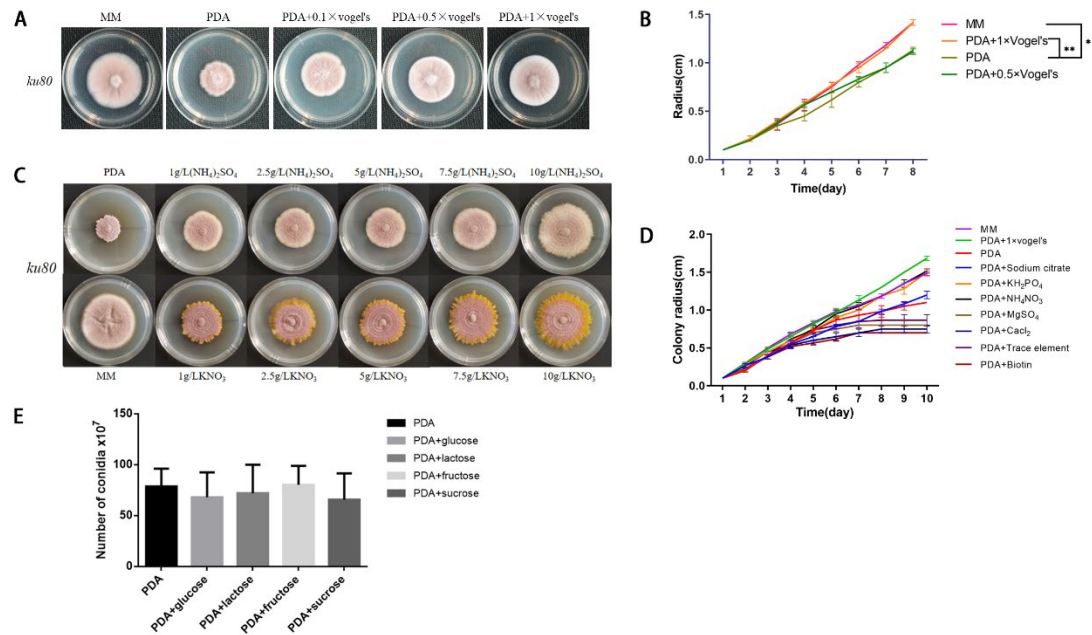

**Figure S1.** Growth and conidiation of *P. lavendulum* in various conditions. (A) The colony morphology of *ku80* strain on MM, PDA, and PDA with different concentrations of Vogel's. (B) The growth curve of the *ku80* strain on MM, PDA, and PDA with different concentrations of Vogel's. (C) Comparison of colony morphology of *ku80* Strain on MM, PDA, and PDA with different concentrations  $\text{KNO}_3$  or  $(\text{NH}_4)_2\text{SO}_4$ . (D) Growth curve of *ku80* strain on MM, PDA, and PDA with MM components. (E) Conidiation comparison of *ku80* strain on PDA and PDA with four carbon sources.

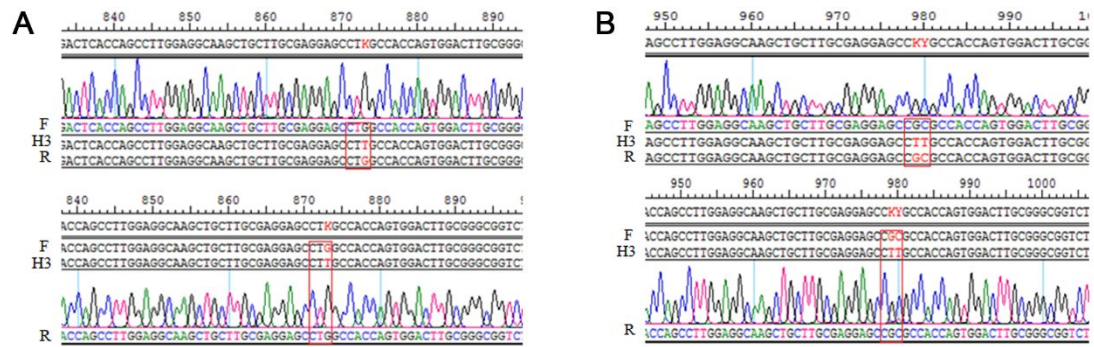

**Figure S2.** Sequencing H3 genes to confirmation of H3K14R and H3K14Q mutation.

(A) CTT mutated to CTG, resulting in H3K14Q mutation. (B) CTT mutated to CGC, resulting in H3K14R mutation. F and R, a paired sequence of each mutant; H3, the wild-type H3 sequence.

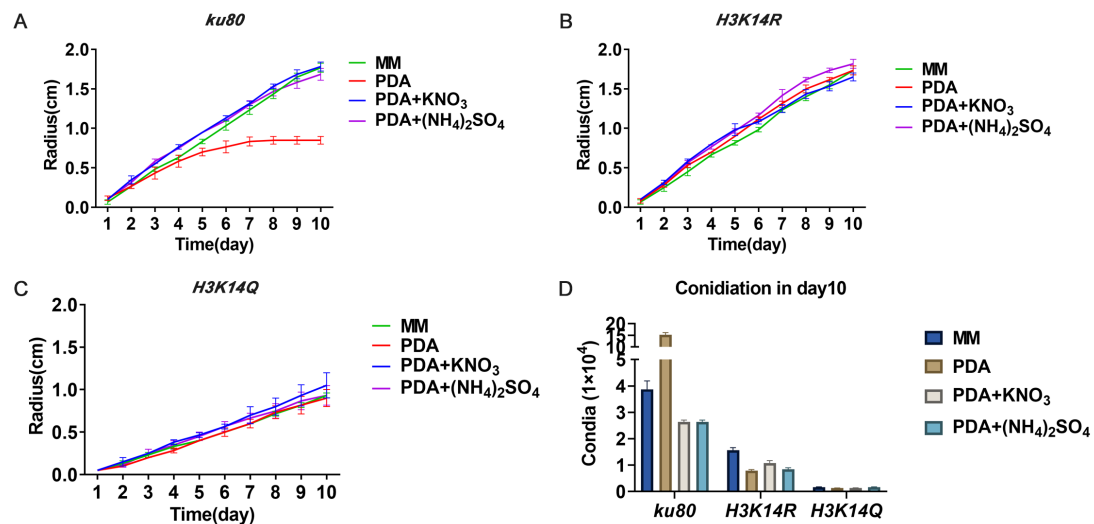

**Figure S3.** Growth and conidiation of *ku80* and two mutants on four different media.

(A-C) Growth comparison of *ku80*, histone *H3K14R* and *H3K14Q* Mutants on four mediums: MM, PDA, PDA+KNO<sub>3</sub>, and PDA+(NH<sub>4</sub>)<sub>2</sub>SO<sub>4</sub>. (E) Conidiation comparison of *ku80* and histone *H3K14R* and *H3K14Q* mutants on the above four mediums.



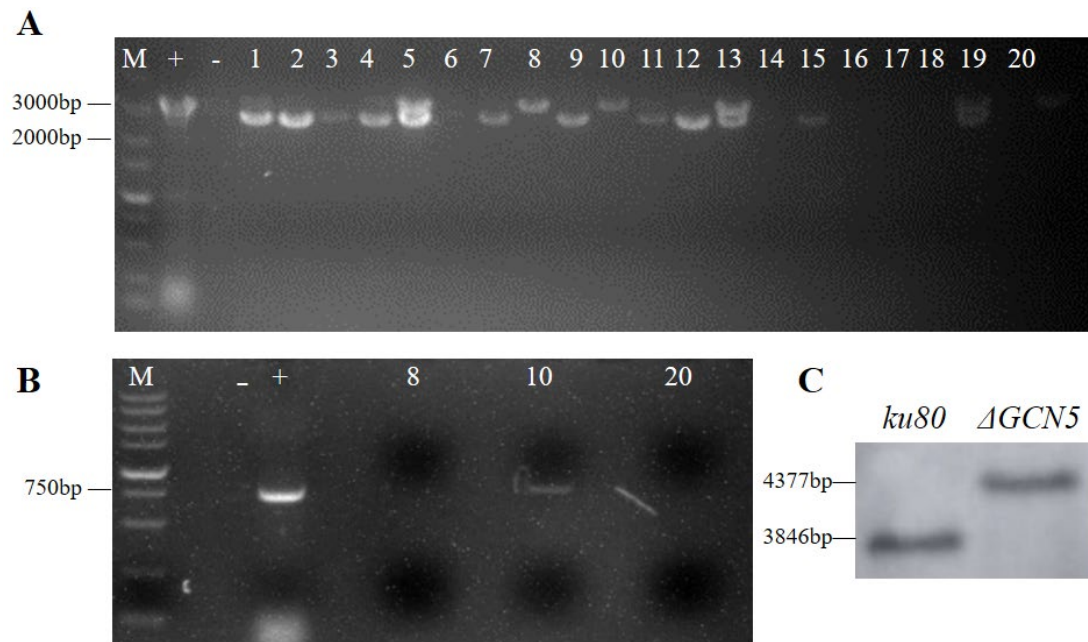

**Figure S4.** *Plgcn5* knockout validation. (A) PCR screening of *Plgcn5* knockout strains. (B) PCR validation of random insertion of T-DNA in  $\Delta$ *Plgcn5* knockout strains. (C)  $\Delta$ *Plgcn5* knockout strain validated by Southern blot.

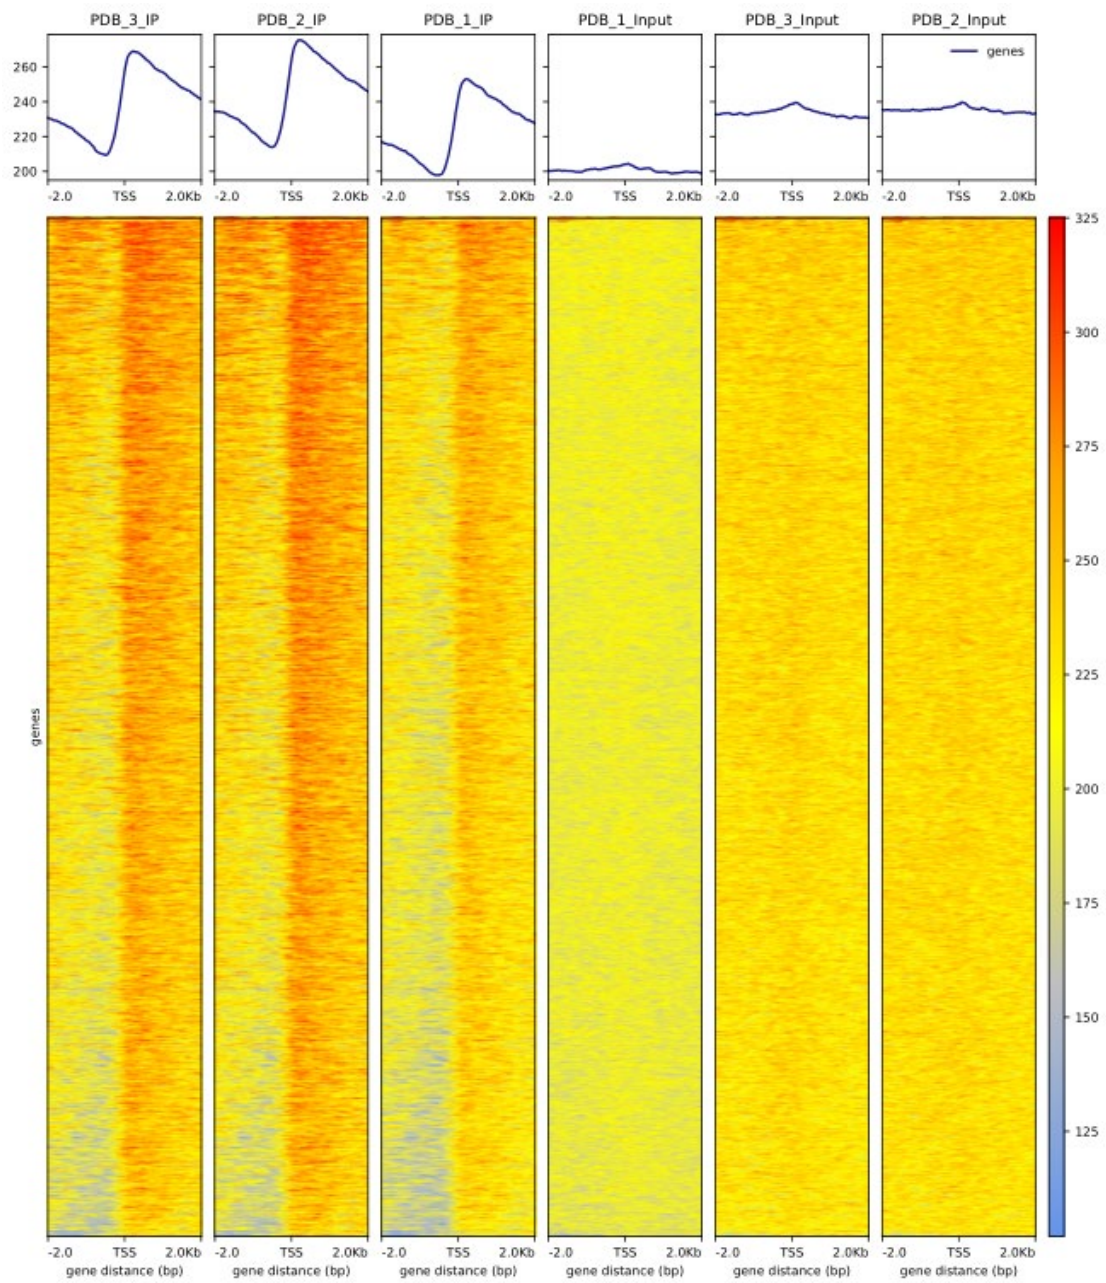

**Figure S5.** The heatmap of peak distribution around the TSS in samples cultured in PDB media.

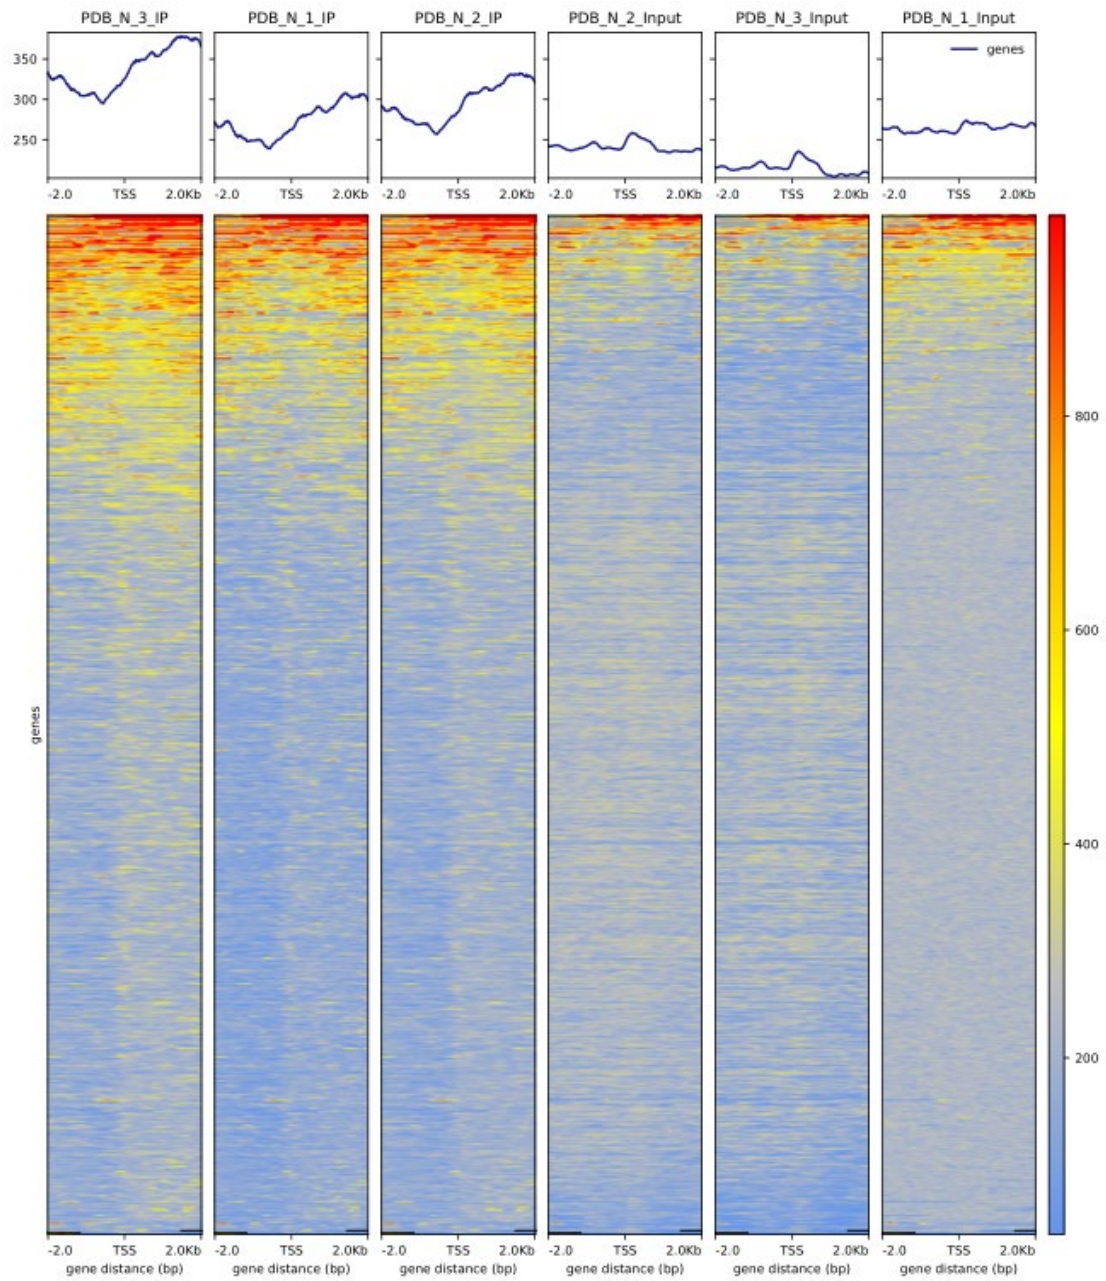

**Figure S6.** The heatmap of peak distribution around the TSS in samples cultured in PDB plus ammonium sulfate media.

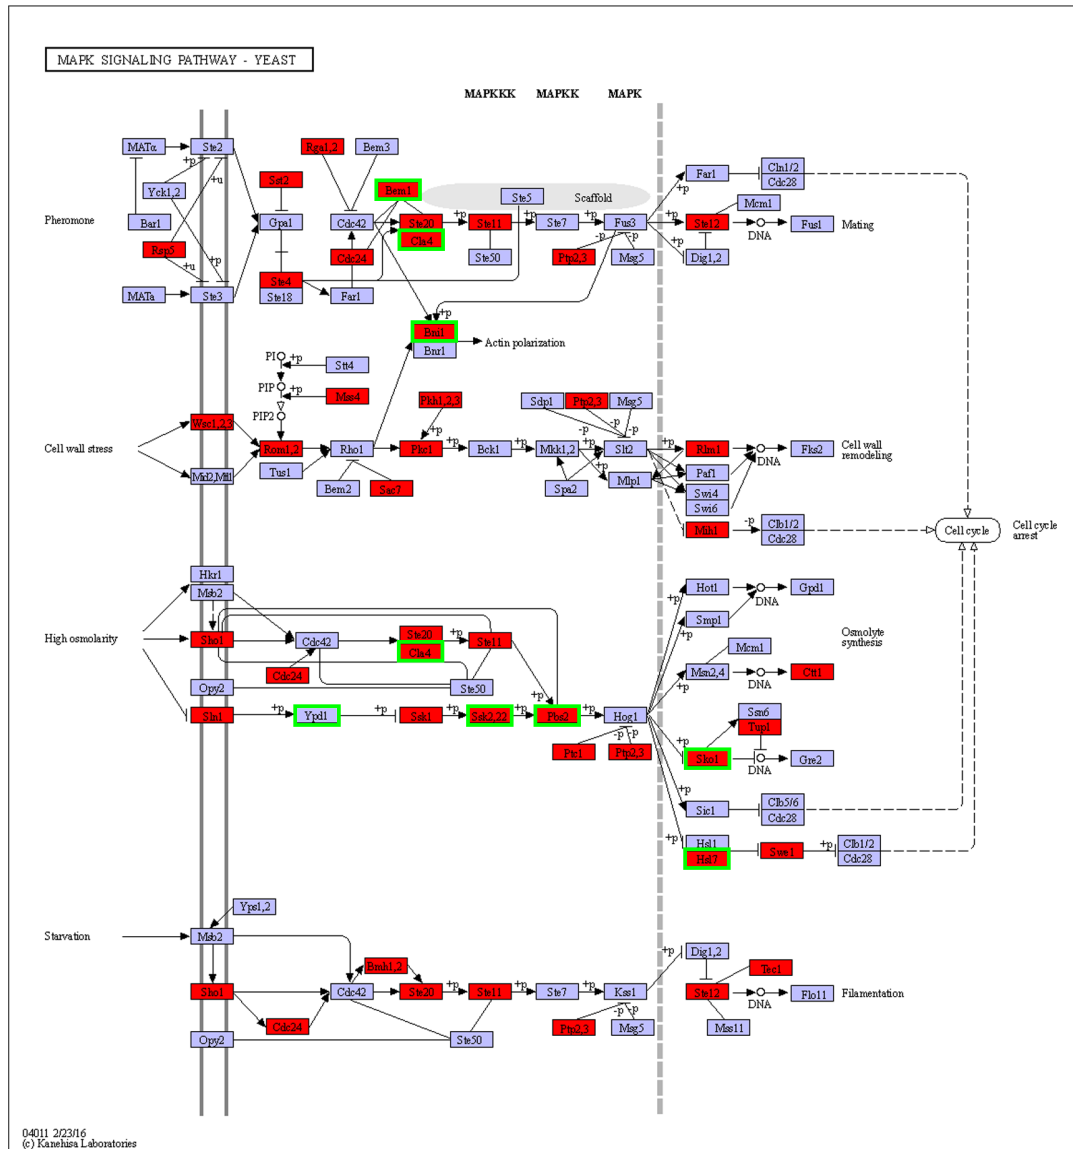

**Figure S7.** H3K14ac is enriched in the MAPK pathway. The genes in the red boxes were enriched in H3K14ac in the samples cultured in the PDB media. The genes in the green-border box were enriched in H3K14ac in the samples cultured in PDB plus ammonium sulphate media.
